# Supplementary material for: Reactant ratio-modulated six new copper(i)–iodide coordination complexes based on diverse [CumIm] aggregates and biimidazole linkers: syntheses, structures and temperature-dependent luminescence properties
Source: Royal Society of Chemistry journal article supplement (doi:10.1039/c3ce41021h), 2013-01-01

## Electronic Supplementary Information (ESI) for *CrystEngComm*

### Reactant Ratio-Modulated Six New Copper(I)-Iodide Coordination Complexes Based on Diverse $[\text{Cu}_m\text{I}_m]$ Aggregates and Biimidazole Linkers: Syntheses, Structures and Temperature-Dependent Luminescence Properties

Shuai Yuan, Hua Wang, Deng-Xu Wang, Hai-Feng Lu, Sheng-Yu Feng, Di Sun,\*

*Key Lab of Colloid and Interface Chemistry, Ministry of Education, School of Chemistry and Chemical Engineering, Shandong University, Jinan, 250100, P. R. China. E-mail: dsun@sdu.edu.cn. Fax: +86-531-88364218.*

|                                                                                                         |   |
|---------------------------------------------------------------------------------------------------------|---|
| 1. Figure S1. The XRD patterns of 1 - 6. ....                                                           | 2 |
| 2. Figure S2. Excitation spectra for 3 and 4 at 298 K.....                                              | 3 |
| 3. Table S1. Crystal Data Collection and Structure Refinement for 3 at four different temperatures..... | 4 |
| 4. Figure S3. The disordered dimb ligand in compound 4.....                                             | 5 |

Electronic Supplementary Information (ESI) for *CrystEngComm*

**1. Figure S1. The XRD patterns of 1 - 6.**

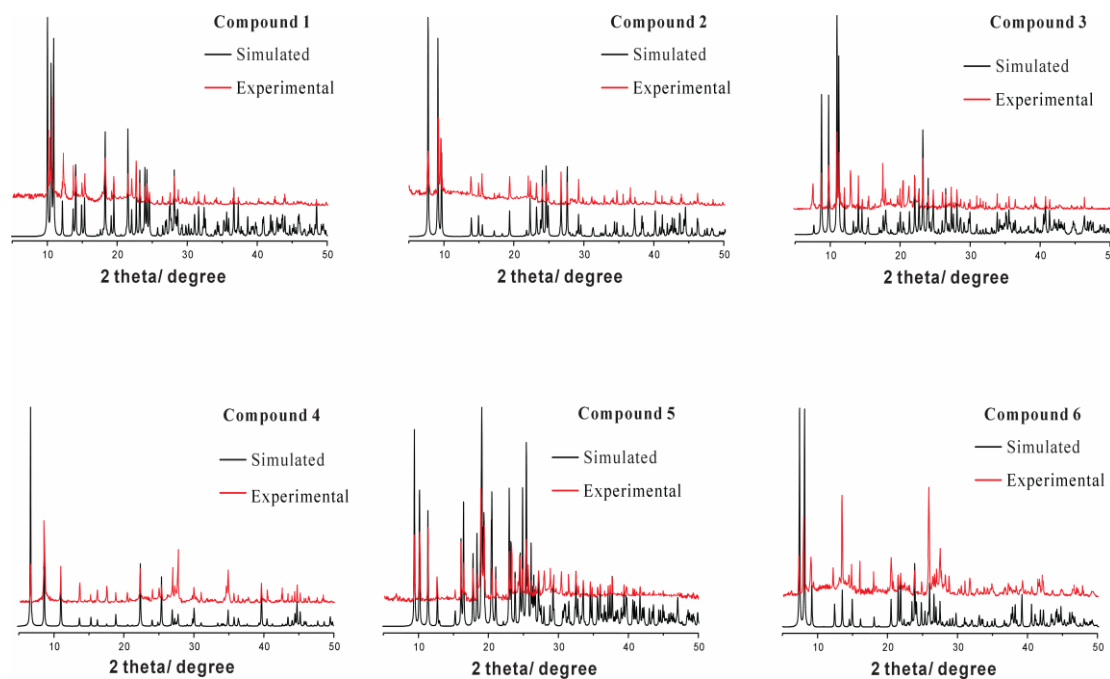

**2. Figure S2. Excitation spectra for 3 and 4 at 298 K.**

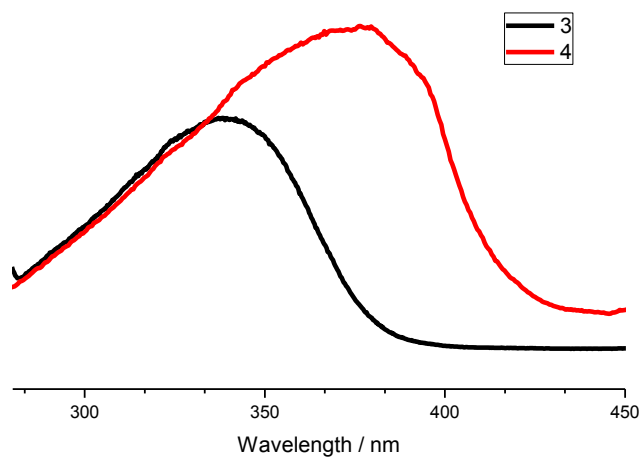

Electronic Supplementary Information (ESI) for *CrystEngComm*

**3. Table S1. Crystal Data Collection and Structure Refinement for 3 at four different temperatures.**

| Temperature/K                               | 100(2)                                                                        | 160(2)                                                                        | 220(2)                                                                        | 298(2)                                                                        |
|---------------------------------------------|-------------------------------------------------------------------------------|-------------------------------------------------------------------------------|-------------------------------------------------------------------------------|-------------------------------------------------------------------------------|
| Empirical formula                           | C <sub>18</sub> H <sub>27</sub> Cu <sub>3</sub> I <sub>3</sub> N <sub>6</sub> | C <sub>18</sub> H <sub>27</sub> Cu <sub>3</sub> I <sub>3</sub> N <sub>6</sub> | C <sub>18</sub> H <sub>27</sub> Cu <sub>3</sub> I <sub>3</sub> N <sub>6</sub> | C <sub>18</sub> H <sub>27</sub> Cu <sub>3</sub> I <sub>3</sub> N <sub>6</sub> |
| Formula weight                              | 898.78                                                                        | 898.78                                                                        | 898.78                                                                        | 898.78                                                                        |
| Crystal system                              | triclinic                                                                     | triclinic                                                                     | triclinic                                                                     | triclinic                                                                     |
| Space group                                 | P-1                                                                           | P-1                                                                           | P-1                                                                           | P-1                                                                           |
| a/Å                                         | 10.2669(12)                                                                   | 10.2961(9)                                                                    | 10.352(2)                                                                     | 10.3645(8)                                                                    |
| b/Å                                         | 10.7531(14)                                                                   | 10.7386(10)                                                                   | 10.760(2)                                                                     | 10.7637(9)                                                                    |
| c/Å                                         | 11.8781(15)                                                                   | 11.9132(10)                                                                   | 11.977(2)                                                                     | 12.0346(10)                                                                   |
| α/°                                         | 106.838(2)                                                                    | 106.7680(10)                                                                  | 106.782(3)                                                                    | 106.9346(12)                                                                  |
| β/°                                         | 90.109(2)                                                                     | 90.2070(10)                                                                   | 90.335(3)                                                                     | 90.3554(13)                                                                   |
| γ/°                                         | 101.790(2)                                                                    | 101.7260(10)                                                                  | 101.715(3)                                                                    | 101.8012(11)                                                                  |
| Volume/Å <sup>3</sup>                       | 1226.0(3)                                                                     | 1232.14(19)                                                                   | 1247.7(4)                                                                     | 1254.11(18)                                                                   |
| Z                                           | 2                                                                             | 2                                                                             | 2                                                                             | 2                                                                             |
| ρ <sub>calc</sub> g/cm <sup>3</sup>         | 2.435                                                                         | 2.423                                                                         | 2.392                                                                         | 2.380                                                                         |
| m/mm <sup>-1</sup>                          | 6.374                                                                         | 6.342                                                                         | 6.263                                                                         | 6.231                                                                         |
| F(000)                                      | 846.0                                                                         | 846.0                                                                         | 846.0                                                                         | 846.0                                                                         |
| Crystal size/mm <sup>3</sup>                | 0.15 × 0.10 × 0.10                                                            | 0.15 × 0.10 × 0.10                                                            | 0.15 × 0.10 × 0.10                                                            | 0.15 × 0.10 × 0.10                                                            |
| 2θ range for data collection                | 3.6 to 50°                                                                    | 3.58 to 50°                                                                   | 3.56 to 49.98°                                                                | 3.54 to 50°                                                                   |
| Reflections collected                       | 6135                                                                          | 6113                                                                          | 6102                                                                          | 6288                                                                          |
| Independent reflections                     | 4276[R(int) = 0.0169]                                                         | 4280[R(int) = 0.0146]                                                         | 4295[R(int) = 0.0173]                                                         | 4372[R(int) = 0.0179]                                                         |
| Data/restraints/parameters                  | 4276/0/271                                                                    | 4280/0/271                                                                    | 4295/0/271                                                                    | 4372/0/271                                                                    |
| Goodness-of-fit on F <sup>2</sup>           | 1.154                                                                         | 1.072                                                                         | 1.095                                                                         | 1.020                                                                         |
| Final R indexes [I>=2σ (I)]                 | R <sub>1</sub> = 0.0252, wR <sub>2</sub> = 0.0688                             | R <sub>1</sub> = 0.0249, wR <sub>2</sub> = 0.0598                             | R <sub>1</sub> = 0.0313, wR <sub>2</sub> = 0.0780                             | R <sub>1</sub> = 0.0304, wR <sub>2</sub> = 0.0667                             |
| Final R indexes [all data]                  | R <sub>1</sub> = 0.0293, wR <sub>2</sub> = 0.0804                             | R <sub>1</sub> = 0.0279, wR <sub>2</sub> = 0.0632                             | R <sub>1</sub> = 0.0398, wR <sub>2</sub> = 0.0892                             | R <sub>1</sub> = 0.0399, wR <sub>2</sub> = 0.0716                             |
| Largest diff. peak/hole / e Å <sup>-3</sup> | 0.86/-0.89                                                                    | 1.09/-0.70                                                                    | 0.96/-0.71                                                                    | 0.72/-0.68                                                                    |

**4. Figure S3. The disordered dimb ligand in compound 4.**

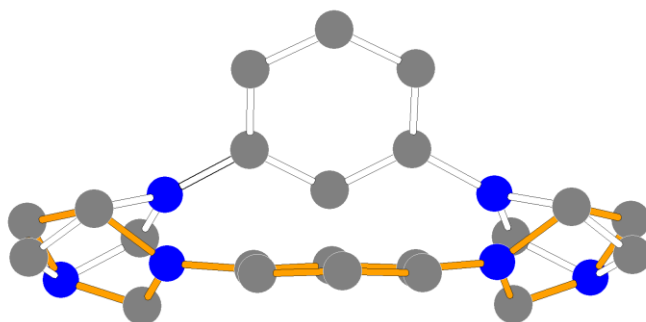

Supplement: c3ce41021h.pdf [file c3ce41021h.pdf]
